# Supplementary material
Source: Springer Nature journal article supplement (https://www.springermedizin.de/resource/supplementary/12985_2009_678_MOESM7_ESM.pdf/9608252)

dN/dS = 1.145; 56%

dN/dS = 0.595; 41%

dN/dS = 0.231; 3%

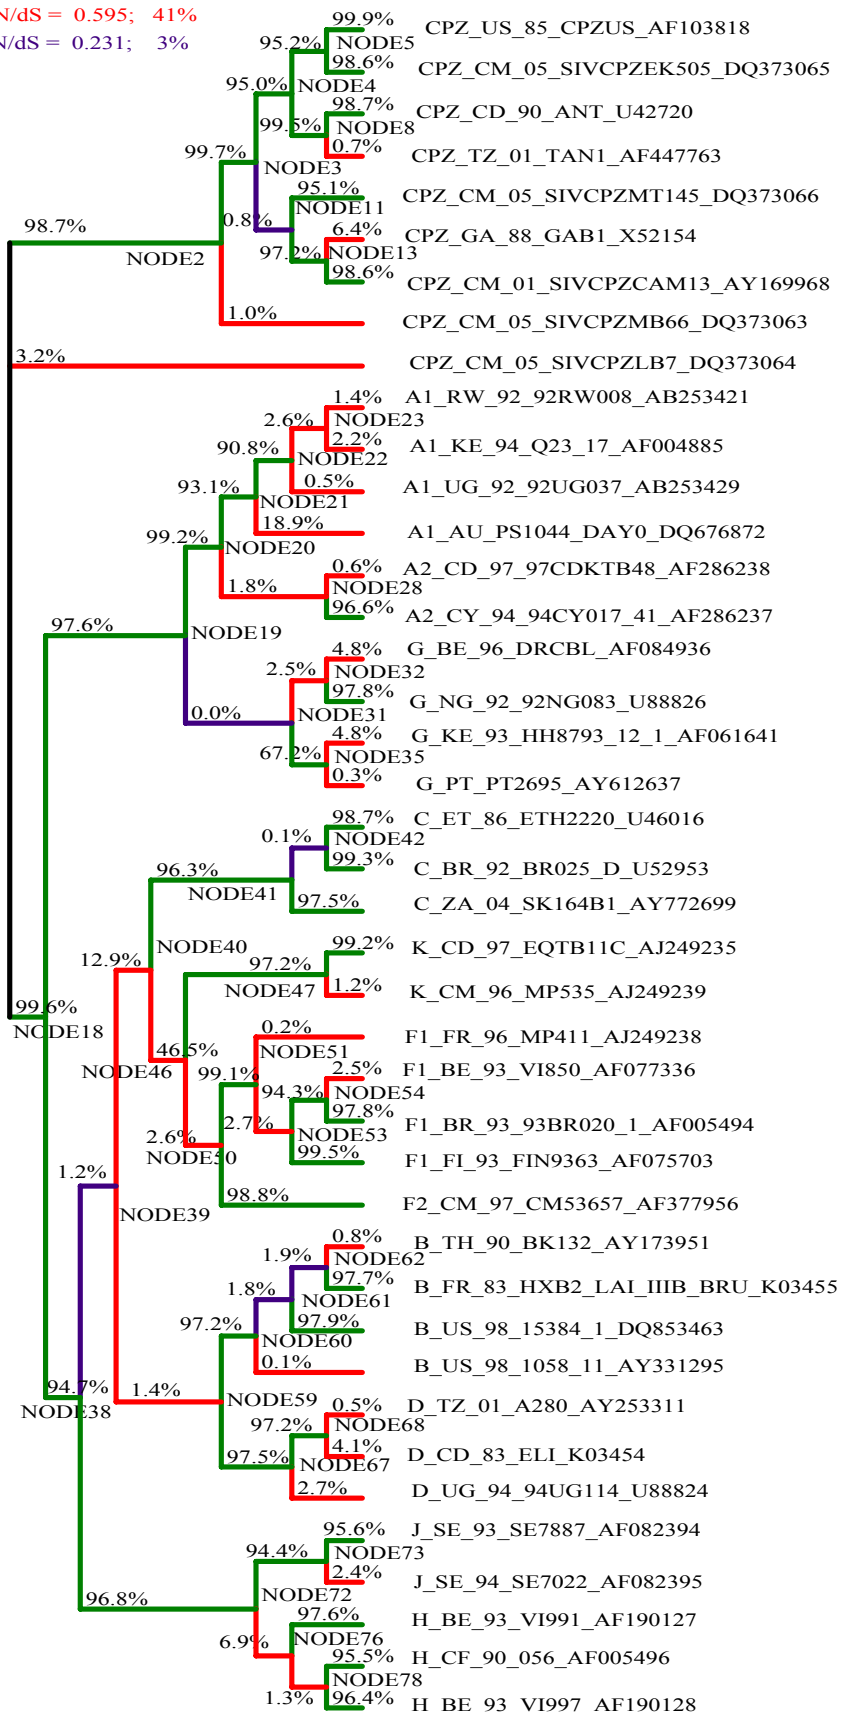

Supplement: MOESM7 [file 9608252]
